# Supplementary material for: Hollow fiber-protected metal–organic framework materials as micro-solid-phase extraction adsorbents for the determination of polychlorinated biphenyls in water samples by gas chromatography-tandem mass spectrometry
Source: Royal Society of Chemistry journal article supplement (doi:10.1039/c3ay40305j), 2013-01-01
Supplement: c3ay40305j.pdf [file c3ay40305j.pdf]

## Supplementary materials

# Hollow fiber-protected metal–organic framework material as micro-solid-phase extraction adsorbent for the determination of polychlorinated biphenyls in water samples by gas chromatography-tandem mass spectrometry

Hao Zang,<sup>a,b</sup> Jin-Peng Yuan,<sup>a,c</sup> Xiang-Feng Chen,<sup>\*a</sup>

Chang-An Liu,<sup>a</sup> Chuan-Ge Cheng,<sup>a</sup> and Ru-Song Zhao<sup>\*a</sup>

<sup>a</sup> Key laboratory for applied technology of sophisticated analytical instruments of Shandong province, Shandong Academy of Sciences, Jinan, P. R. China

<sup>b</sup> College of Chemical and Environmental Engineering, Shandong University of Science and Technology, Qingdao, Shandong, P.R. China

<sup>c</sup> School of Environmental Science and Engineering, Shandong University, Jinan, China

Address correspondence to: Dr. X.-F. Chen, Key Laboratory for Applied Technology of Sophisticated Analytical Instruments, Academy of Sciences, Shandong, Jinan, P. R. China.

Tel.: +86-531-82605340; Fax: +86-531-82964889

*E-mail address:* [xiangfchen@aliyun.com](mailto:xiangfchen@aliyun.com), [zhaors1976@126.com](mailto:zhaors1976@126.com)

Table S1. GC-MS/MS MRM Data Acquisition Method for 7 PCBs

| Compounds | Retention time (min) | Quantity              |                            | Qualification         |                            |
|-----------|----------------------|-----------------------|----------------------------|-----------------------|----------------------------|
|           |                      | Collision energy (eV) | Monitored transition (m/z) | Collision energy (eV) | Monitored transition (m/z) |
| PCB 28    | 13.13                | 26                    | 256.0-186.0                | 26                    | 258-186                    |
| PCB 53    | 13.98                | 28                    | 289.9-220.0                | 28                    | 291.9-222                  |
| PCB 101   | 16.11                | 28                    | 323.9-253.9                | 28                    | 325.9-255.9                |
| PCB 123   | 17.59                | 28                    | 323.9-253.9                | 28                    | 325.9-255.9                |
| PCB 137   | 18.11                | 28                    | 359.8-289.9                | 28                    | 357.8-287.9                |
| PCB 153   | 18.75                | 28                    | 359.8-289.9                | 28                    | 357.8-287.9                |
| PCB 180   | 20.25                | 30                    | 393.8-323.9                | 30                    | 395.8-325.9                |
